# Supplementary material for: Exposure to Low-Dose Ionizing Radiation from Medical Imaging Procedures
Source: Atypon-hosted journal article supplement (doi:10.1056/nejmoa0901249), 2009-08-26
Supplement: nejm_fazel_849sa1.pdf [file nejm_fazel_849sa1.pdf]

## Supplementary Appendix

This appendix has been provided by the authors to give readers additional information about their work.

Supplement to: Fazel R, Krumholz HM, Wang Y, et al. Exposure to low-dose ionizing radiation from medical imaging procedures. *N Engl J Med* 2009;361:849-57.

**Appendix 1. Distribution of Total Effective Dose by the Type of Imaging Procedure**

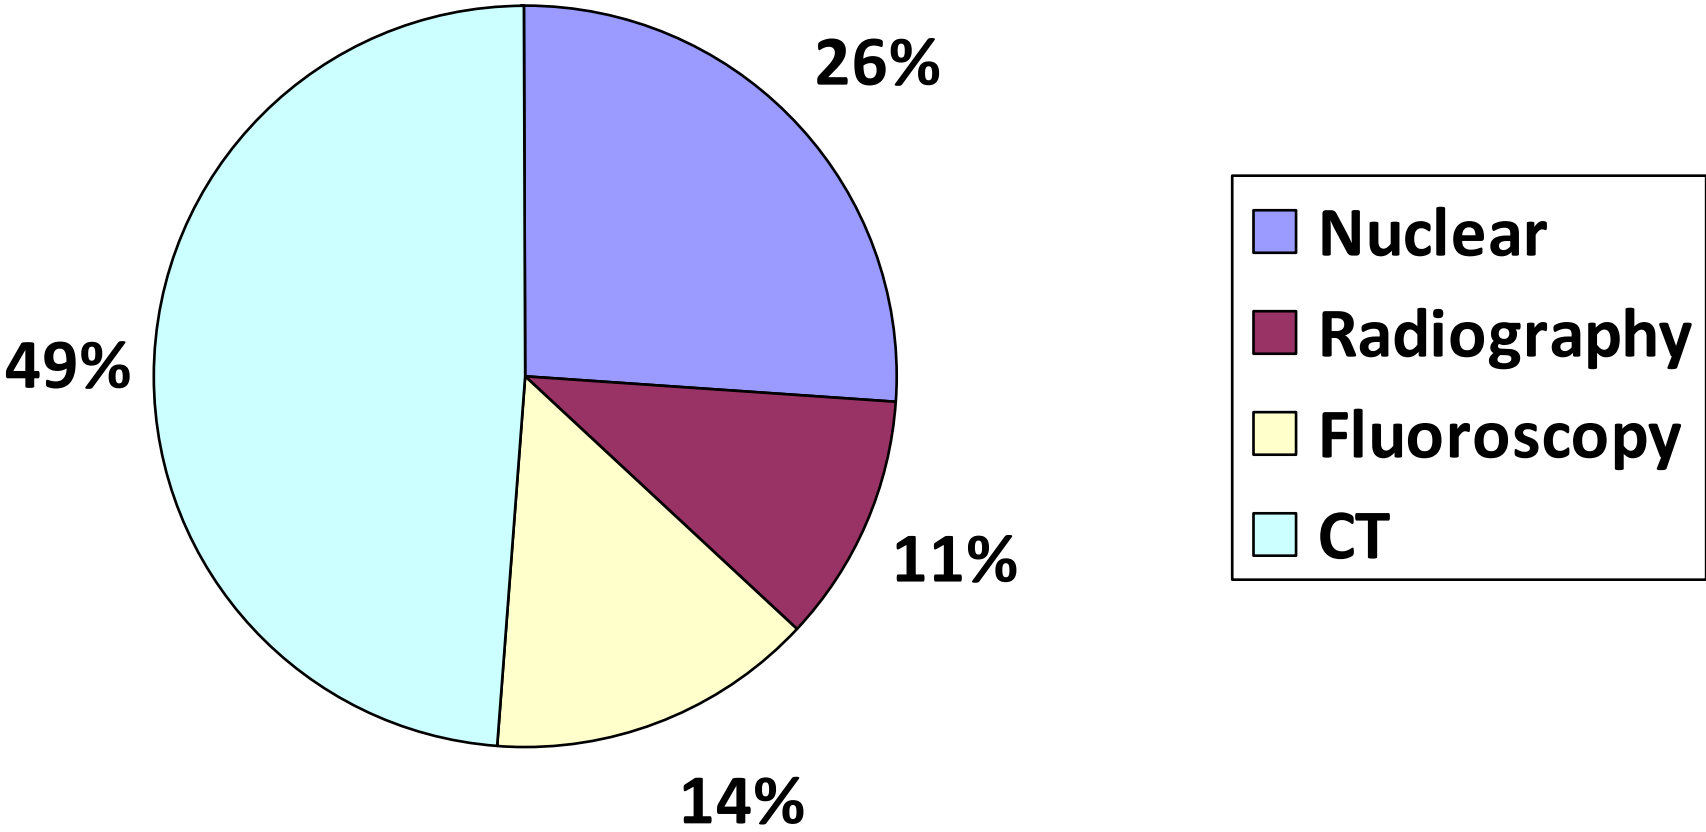

## Appendix 2. Distribution of Total Effective Dose by Anatomic Site of the Imaging Procedure

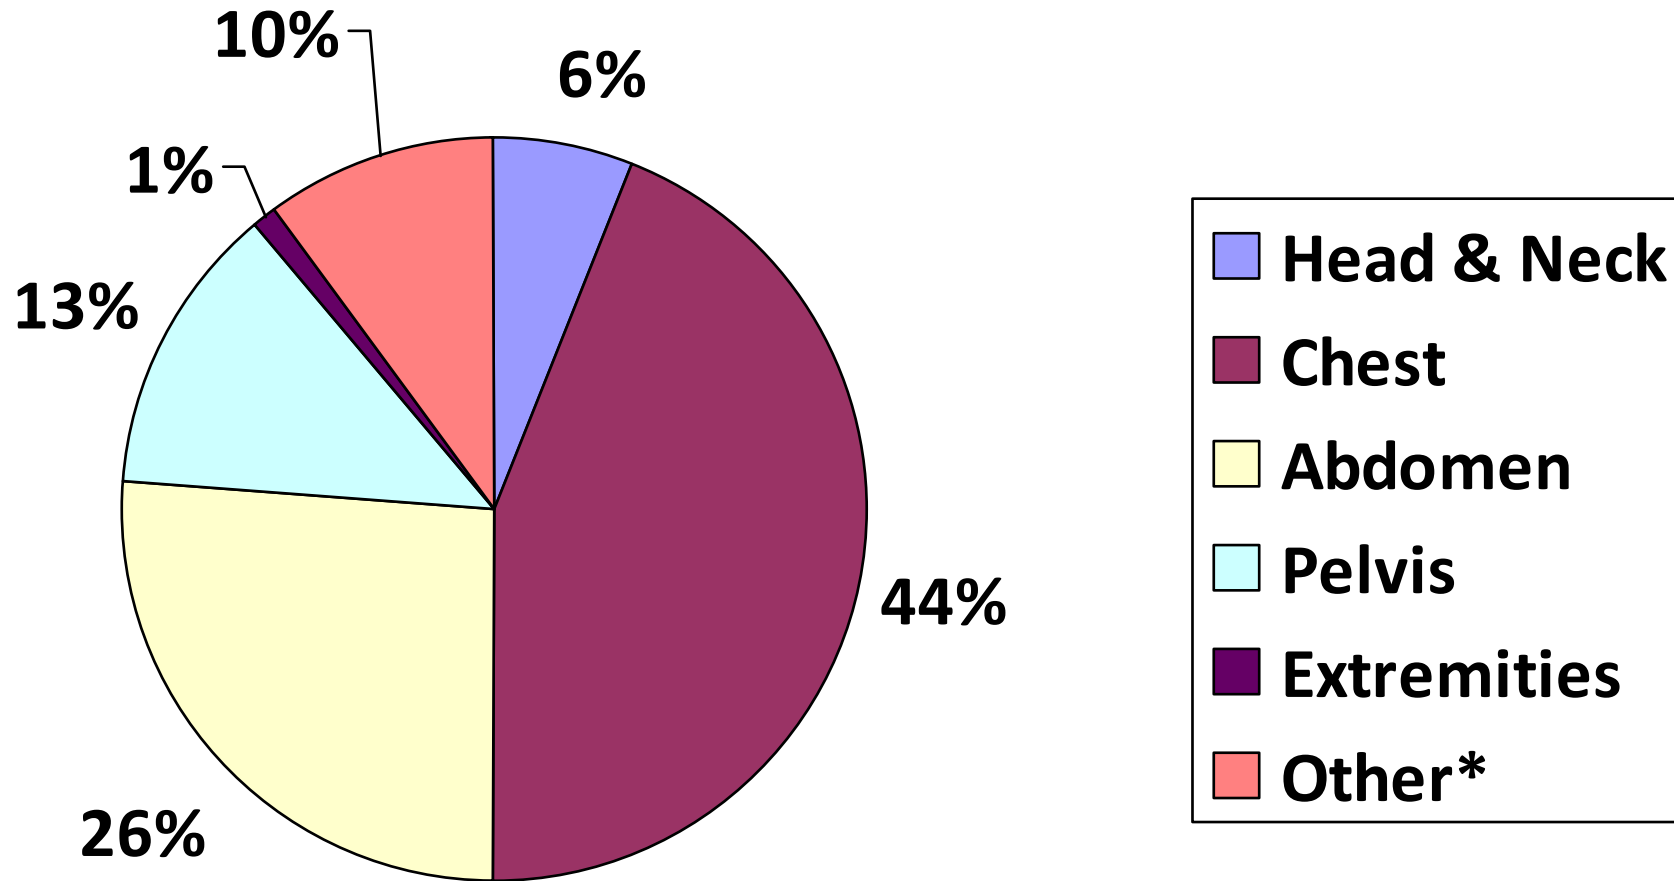

\*Other denotes procedures involving multiple anatomic areas or where the anatomic site was unspecified

### Appendix 3. Distribution of Total Effective Dose by Location of Service of the Imaging Procedure

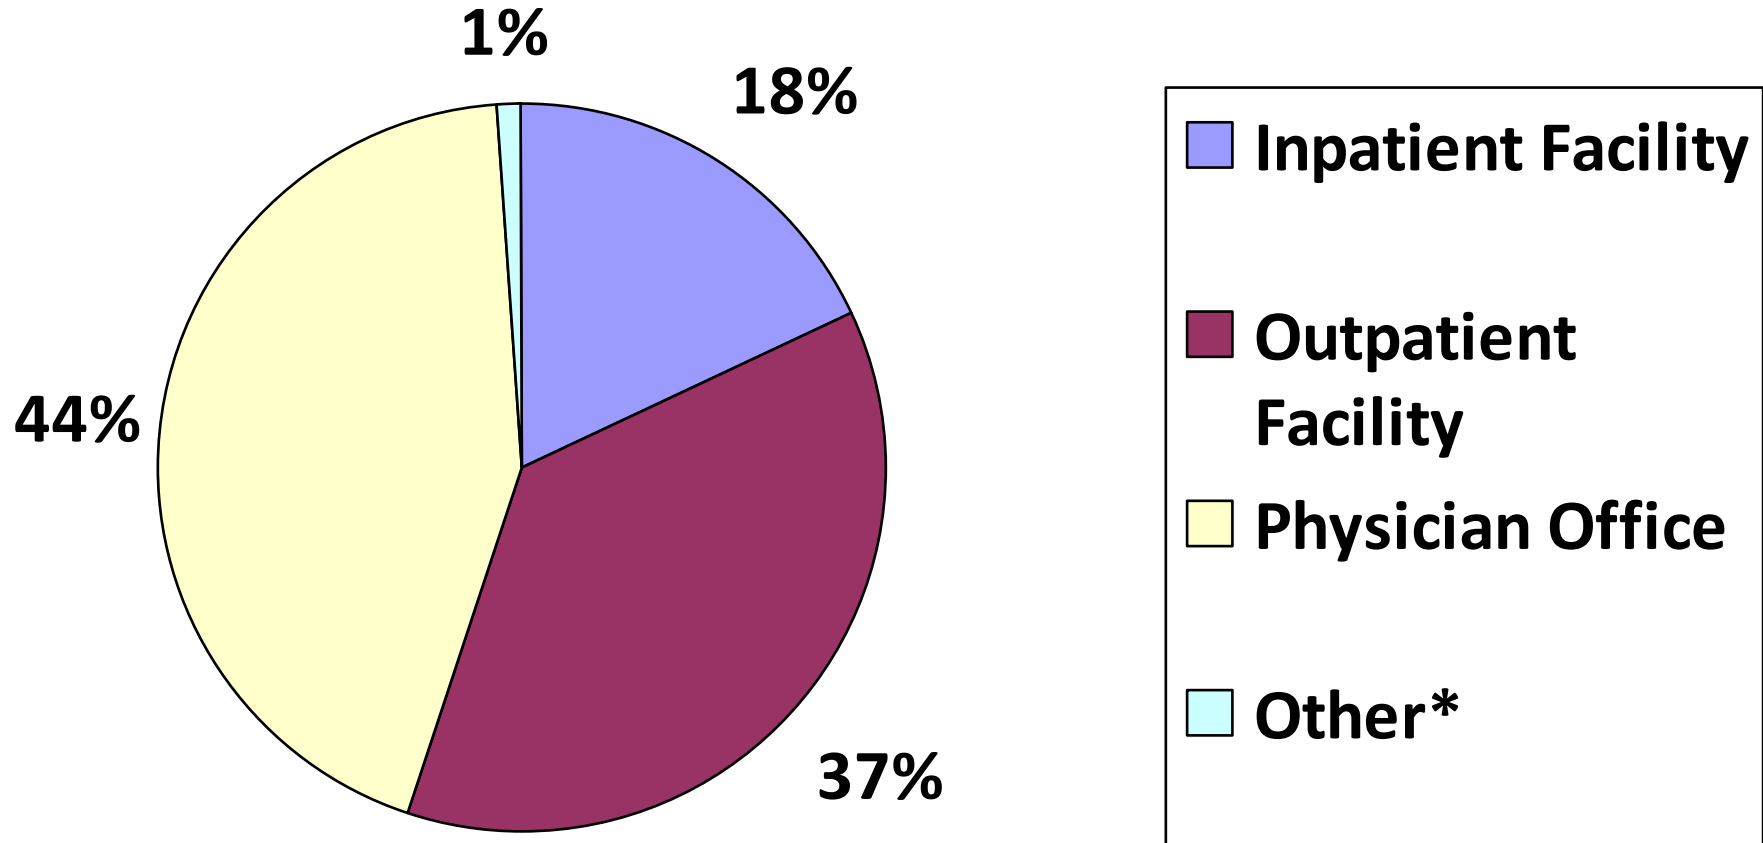

\*Other includes procedures performed at home, hospice, student health services, or an unspecified location.
